# Supplementary material for: Circulating PCSK9 Level and Risk of Cardiovascular Events and Death in Hemodialysis Patients
Source: MDPI journal article supplement (doi:10.3390/jcm9010244), 2020-01-17
Supplement: s1 [file s1]

**Supplementary Materials:****Table S1.** Correlation of PCSK9 level with serum lipid, cytokines and bone-related protein levels

|                           | <b>No statin<br/>(n = 189)</b> | <b>Statin<br/>(n = 164)</b> |
|---------------------------|--------------------------------|-----------------------------|
| Total cholesterol (mg/dL) | 0.071                          | 0.154 <sup>a</sup>          |
| Triglyceride (mg/dL)      | 0.060                          | 0.142                       |
| LDL (mg/dL)               | 0.049                          | 0.072                       |
| HDL (mg/dL)               | -0.023                         | -0.042                      |
| hsCRP (mg/dL)             | 0.034                          | -0.051                      |
| MCP-1 (pg/mL)             | 0.080                          | 0.045                       |
| IL-6 (pg/ml)              | 0.092                          | 0.043                       |
| Osteoprotegerin (pg/ml)   | 0.129                          | -0.039                      |
| RANKL (pg/ml)             | 0.094                          | -0.065                      |

HD, hemodialysis; HDL, high-density lipoprotein cholesterol; hsCRP, high-sensitivity C-reactive protein; IL-6, interleukin-6; LDL, low-density lipoprotein cholesterol; MCP-1, monocyte chemoattractant protein-1; RANKL, receptor activator of nuclear factor kappa-B ligand. <sup>a</sup>  $p < 0.05$

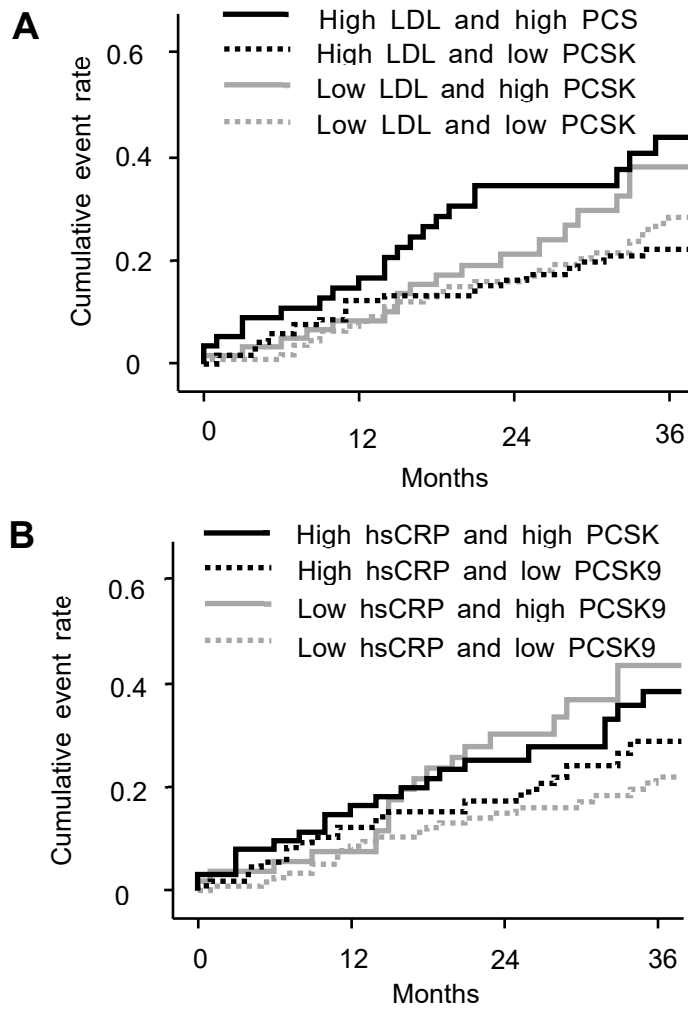

**Figure S1.** Cumulative event rates of plasma tertile 3 PCSK9 for composite events based on predefined LDL (A), and hsCRP level (B). High PCSK9 was defined as tertile 3, and criteria for predefined subgroups was based on median values; high LDL > 75 mg/dL; high hsCRP, > 0.85 mg/dL. hsCRP, high-sensitivity C-reactive protein; LDL-cholesterol, low-density lipoprotein cholesterol.
